# Supplementary material for: Heterogeneity in SDF-1 Expression Defines the Vasculogenic Potential of Adult Cardiac Progenitor Cells
Source: PubMed Central journal article supplement (PMC3161114; doi:10.1371/journal.pone.0024013), 2011-08-24
Supplement: pone.0024013.s001.pdf [file pone.0024013.s001.pdf]

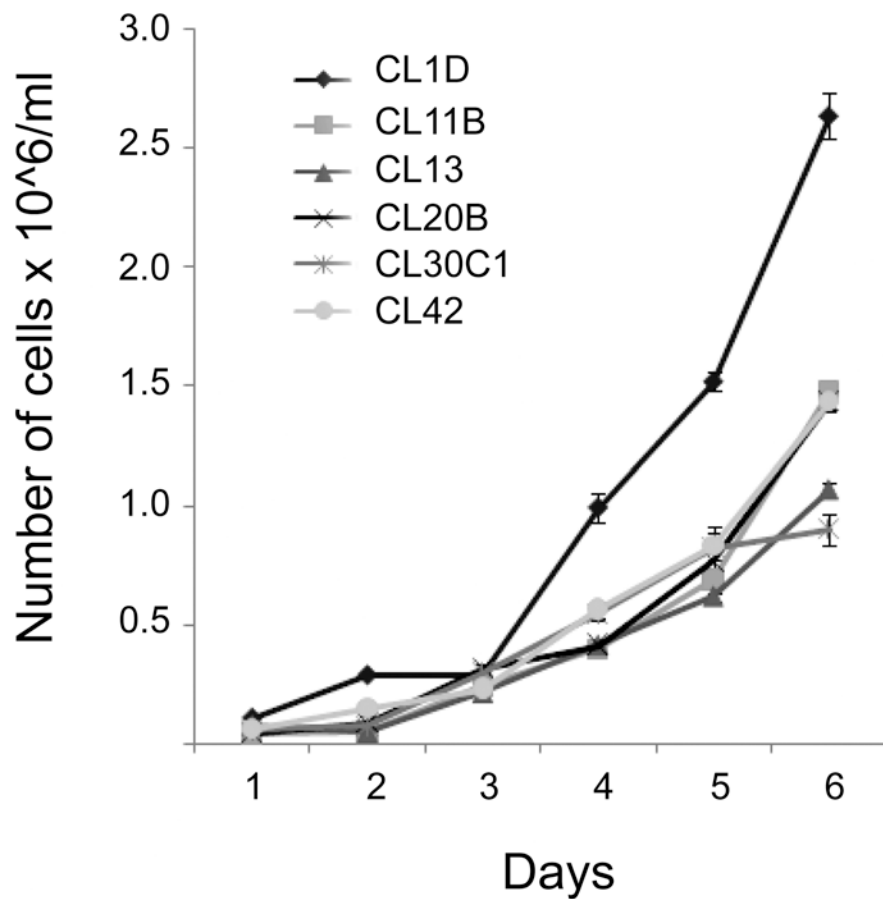

**Figure S1. Growth curves of 6 different cardiac progenitor cell clones.** The growth pattern of CPC clones was followed for a period of 6 days and doubling time was estimated to occur every 24-48 hours. Growth patterns were similar among most clones tested, with one exception. Values correspond to the number of viable cells as determined by trypan blue exclusion.
