# Supplementary material for: Heterogeneity in SDF-1 Expression Defines the Vasculogenic Potential of Adult Cardiac Progenitor Cells
Source: PubMed Central journal article supplement (PMC3161114; doi:10.1371/journal.pone.0024013), 2011-08-24
Supplement: pone.0024013.s002.pdf [file pone.0024013.s002.pdf]

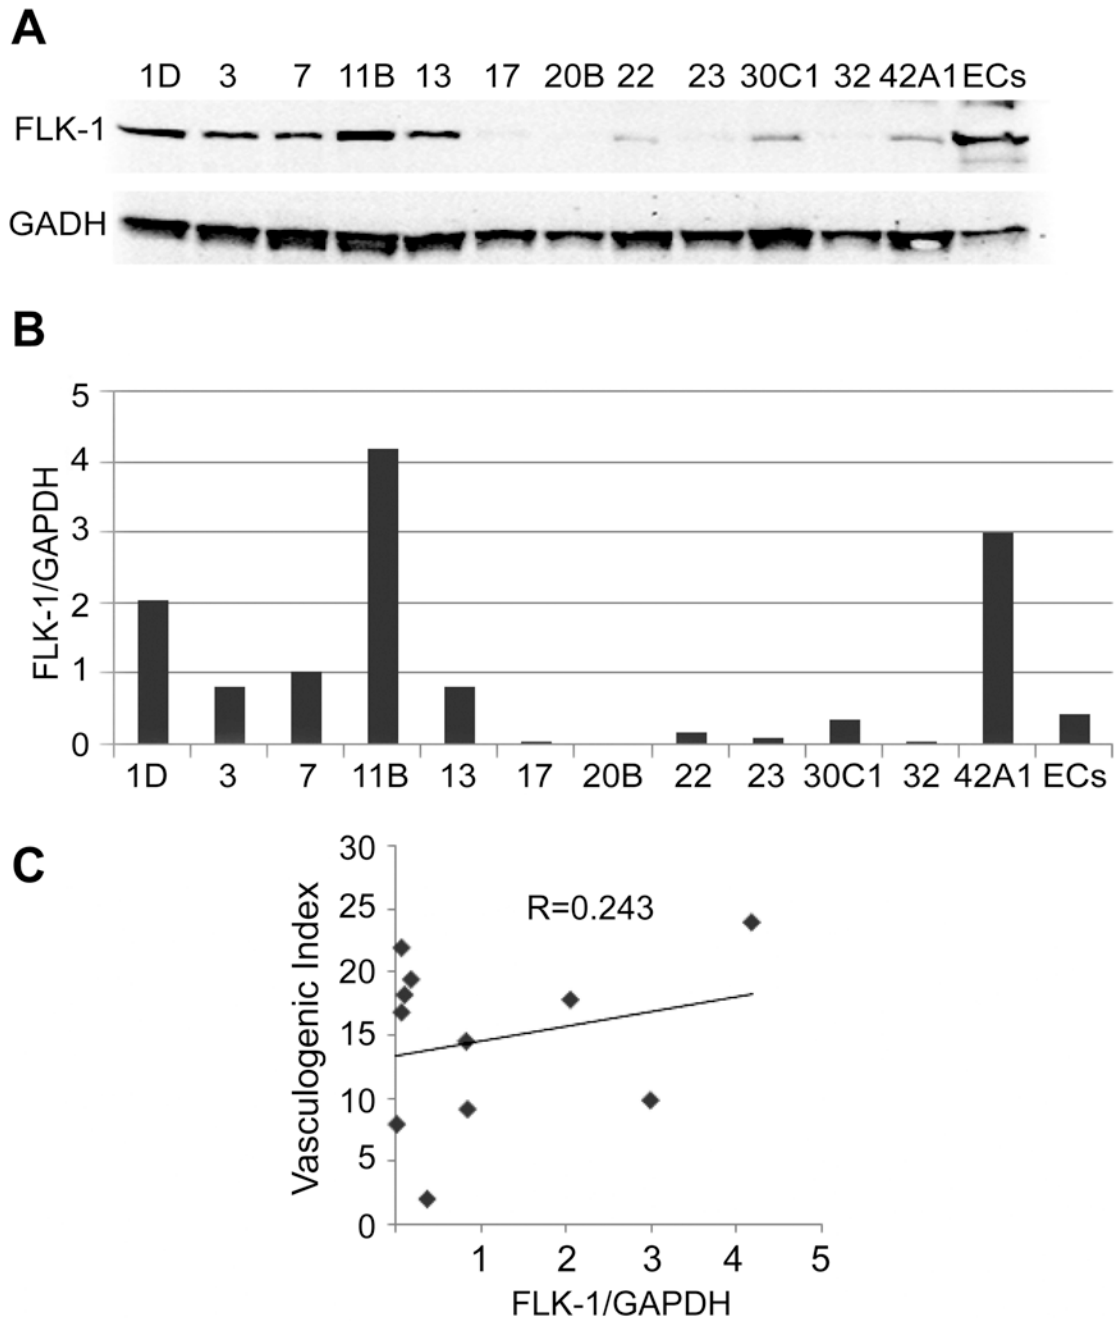

**Figure S2. Weak correlation between FLK-1 expression and vasculogenic potential.** (A) FLK1 expression was measured by Western blot in 12 undifferentiated CPC clones as shown and in HUVECs (ECs). (B) Quantitation of Flk 1 expression for each clone, normalized to GAPDH. (C) Correlation (R) between FLK-1 expression and vasculogenic index (see Supplemental Table 1).
