# Supplementary material for: Heterogeneity in SDF-1 Expression Defines the Vasculogenic Potential of Adult Cardiac Progenitor Cells
Source: PubMed Central journal article supplement (PMC3161114; doi:10.1371/journal.pone.0024013), 2011-08-24
Supplement: pone.0024013.s003.pdf [file pone.0024013.s003.pdf]

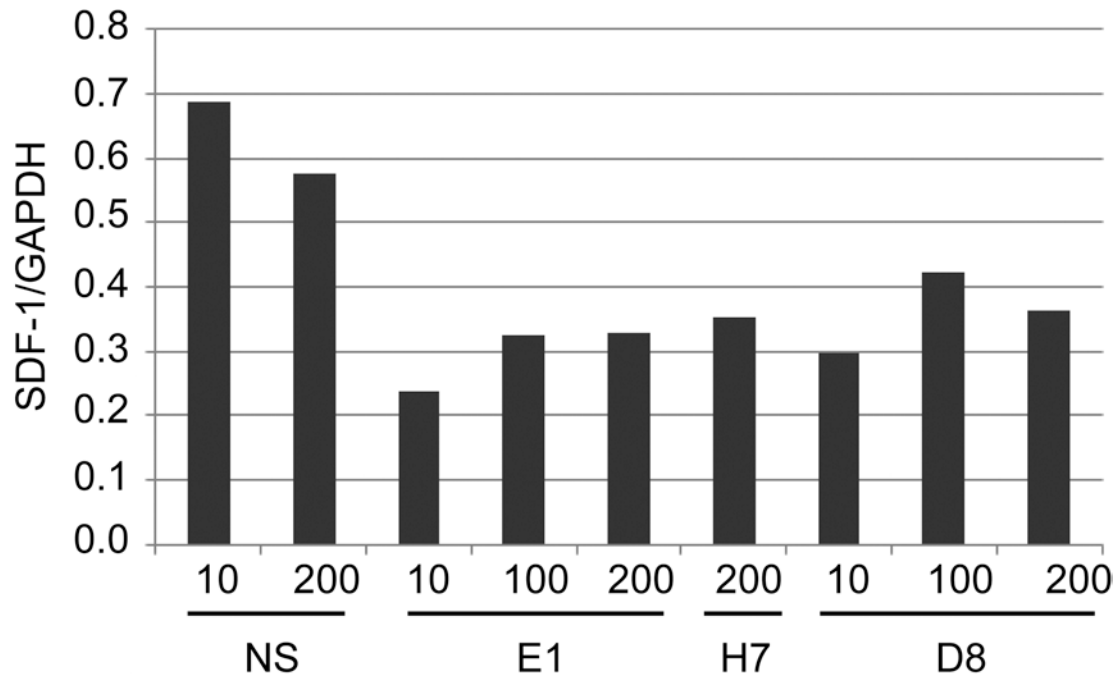

**Figure S3. SDF-1 Knockdown in Cardiac progenitor cells.** SDF-1 was knocked down by lentiviral transduction of CPCs using vectors expressing SDF-1 shRNA. Subclones expressing one of three different shRNAs (E1, H7, D8) or a scrambled control shRNA (NS) were generated from the same parental clone. Original viral transduction dose (particles/cell) shown on abscissa.
