# Supplementary material for: Heterogeneity in SDF-1 Expression Defines the Vasculogenic Potential of Adult Cardiac Progenitor Cells
Source: PubMed Central journal article supplement (PMC3161114; doi:10.1371/journal.pone.0024013), 2011-08-24
Supplement: pone.0024013.s004.pdf [file pone.0024013.s004.pdf]

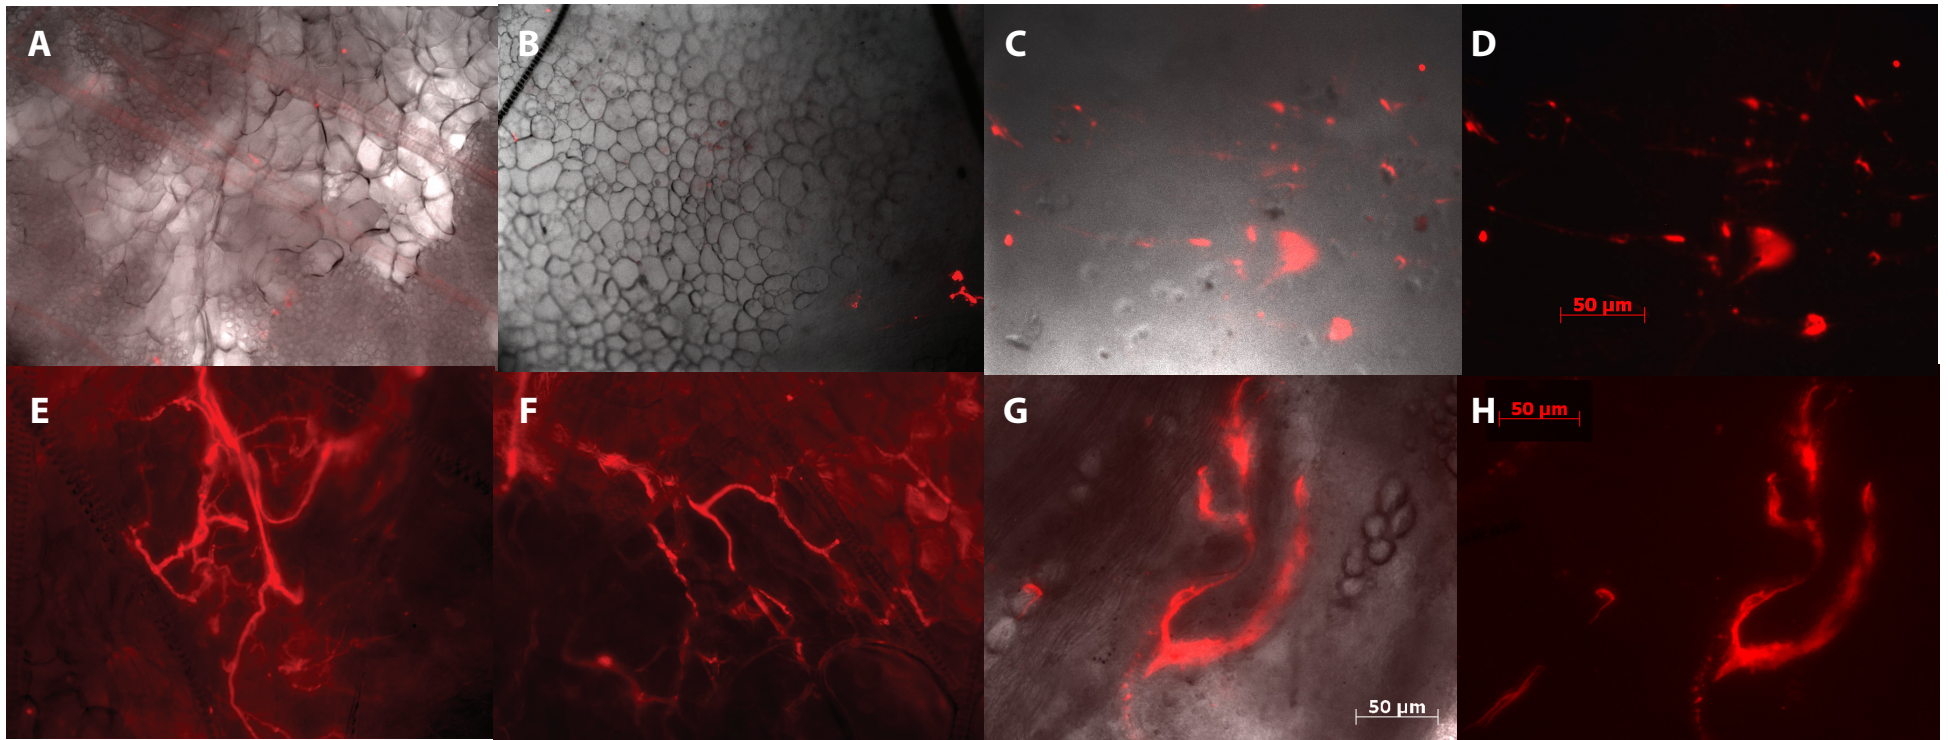

**Figure S4. Angiogenesis in Matrigel dermal inserts of CPCs.** Low growth factor Matrigel plugs were implanted without cells (A), with weakly vasculogenic CPC clone 30C1 (B-D), and with vasculogenic clone 11B (E-H). A-C and G show overlay of brightfield and epifluorescent images. Original magnification A, B, E, F = 10x, C, D, G, H = 32X.
