# Supplementary material for: Heterogeneity in SDF-1 Expression Defines the Vasculogenic Potential of Adult Cardiac Progenitor Cells
Source: PubMed Central journal article supplement (PMC3161114; doi:10.1371/journal.pone.0024013), 2011-08-24
Supplement: pone.0024013.s005.pdf [file pone.0024013.s005.pdf]

**Table S1. GO functions that cluster CPC clones with similar morphology.**

| <b>GO Function</b>                          | <b>Gene Name</b> |
|---------------------------------------------|------------------|
| <b>Antibody dependent cellular toxicity</b> | Fcgr3            |
|                                             | Lgh-4            |
|                                             | Lgh-1a           |
| <b>Cell death</b>                           | Aplp1            |
|                                             | Clu              |
|                                             | Tnfrsf1a         |
| <b>Germ cell migration</b>                  | CXC112           |
|                                             | CXCR4            |
| <b>Metal ion homeostasis</b>                | Mt3              |
|                                             | Mt1              |
| <b>Microtubule stabilization</b>            | Clasp1           |
|                                             | Clasp2           |
|                                             | Hdac6            |
|                                             | Mapt             |
|                                             | Rnf30            |
| <b>Morphogenesis of an epithelial sheet</b> | Dag1             |
|                                             | Lama1            |
|                                             | Notch2           |
| <b>Neuronal migration</b>                   | Pxmp3            |
|                                             | Pex5             |
|                                             | Pex5             |

|                                                  |           |
|--------------------------------------------------|-----------|
| <b>Nitric oxide mediated signal transduction</b> | Ddah2     |
|                                                  | Mt1       |
| <b>Nucleolus organization and biogenesis</b>     | Nolc1     |
|                                                  | Pes1      |
| <b>Peroxisome organization and biogenesis</b>    | Abcd3     |
|                                                  | Abcd4     |
|                                                  | Peci      |
|                                                  | Pex3      |
|                                                  | Pex5      |
|                                                  | Pex7      |
|                                                  | Pex11a    |
|                                                  | Pex11b    |
|                                                  | Pex11a    |
|                                                  | Pex16     |
|                                                  | Pex19     |
|                                                  | Pipox     |
|                                                  | Pxmp2     |
| Pxmp3                                            |           |
| <b>Regulation of cell adhesion</b>               | Cmar      |
|                                                  | Prlr      |
|                                                  | Pscd2     |
|                                                  | Pscdbp    |
|                                                  | Stat5a    |
|                                                  | Stat5b    |
| <b>Response to heat</b>                          | A030005K1 |

Dnajb3  
Hspa1b  
Hspa11  
Hspa2  
Hspa8  
Hspa9a  
Hspb1  
Hsp105  
Krtap5-1  
Stk4  
4833428E2

---

**Retinoid metabolism**

Adh5  
Adh1  
Rdh1  
Rbp2  
Rbp1

---

**Sulfate assimilation**

Papss1  
Sult2b1  
Sult1d1

---
